# Supplementary material
Source: PubMed Central journal article supplement (PMC1167552)
Supplement: plntcell_tpc.105.030767_1.pdf [file plntcell_tpc.105.030767_1.pdf]

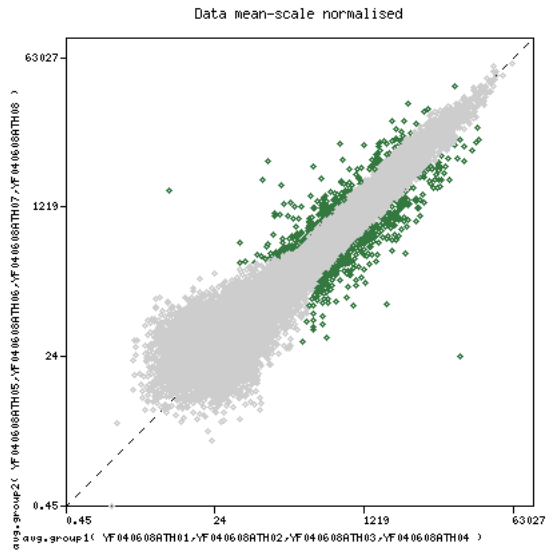

4 *cad-c cad-d* ATH1 genechips versus 4 wild-type ATH1 genechips

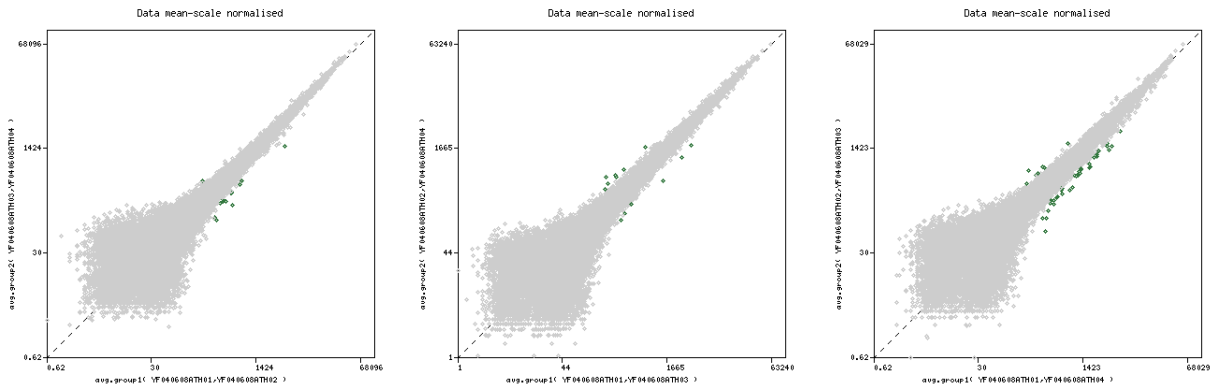

2 wild-type ATH1 genechips versus 2 wild-type ATH1 genechips

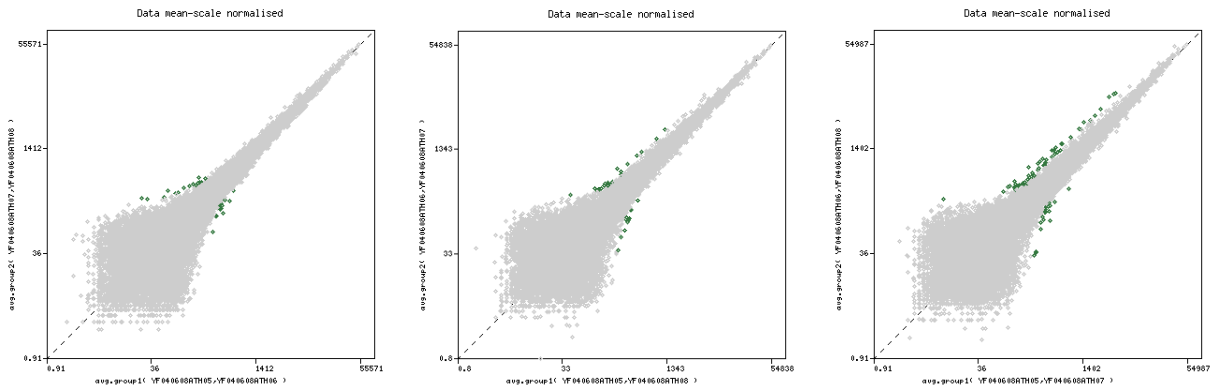

2 *cad-c cad-d* ATH1 genechips versus 2 *cad-c cad-d* ATH1 genechips
