# Supplementary material
Source: PubMed Central journal article supplement (PMC1167552)
Supplement: plntcell_tpc.105.030767_3.pdf [file plntcell_tpc.105.030767_3.pdf]

Yield of thioacidolysis-released monomers in WT, *Atcad cd* and complemented lines.

| Experiment           | Sample               | Thioacidolysis monomers from $\beta$ -O-4 linked H, G and S conventional lignin units <sup>a</sup> |                |                |                | Thioacidolysis indene monomers from C6C3 aldehydes linked at C $\beta$ by $\beta$ -O-4 bonds <sup>a</sup> |                |                |
|----------------------|----------------------|----------------------------------------------------------------------------------------------------|----------------|----------------|----------------|-----------------------------------------------------------------------------------------------------------|----------------|----------------|
|                      |                      | H                                                                                                  | G              | S              | S/G            | G indene                                                                                                  | S indene       |                |
| Experiment 1         | <i>WT1</i>           | 0.55<br>(0.01)                                                                                     | 95.2<br>(0.16) | 32.2<br>(0.01) | 0.34<br>(0.00) | 0.09<br>(0.01)                                                                                            | 0.07<br>(0.00) |                |
|                      | <i>WT2</i>           | 0.57<br>(0.02)                                                                                     | 84.4<br>(0.02) | 30.0<br>(0.06) | 0.36<br>(0.00) | 0.02<br>(0.01)                                                                                            | 0.06<br>(0.01) |                |
|                      | <i>Atcad cd 1</i>    | tr                                                                                                 | 3.41<br>(0.07) | 0.30<br>(0.02) | 0.09<br>(0.00) | 1.74<br>(0.17)                                                                                            | 1.41<br>(0.10) |                |
|                      | <i>Atcad cd 2</i>    | tr                                                                                                 | 3.48<br>(0.20) | 0.31<br>(0.01) | 0.09<br>(0.00) | 1.47<br>(0.07)                                                                                            | 1.35<br>(0.06) |                |
|                      | <i>ChimPdCAD 1</i>   | 0.55<br>(0.00)                                                                                     | 100.5<br>(4.8) | 37.3<br>(1.8)  | 0.37<br>(0.00) | 0.08<br>(0.01)                                                                                            | 0.43<br>(0.04) |                |
|                      | <i>ChimPdCAD 2</i>   | 0.60<br>(0.02)                                                                                     | 130.3<br>(3.0) | 53.2<br>(2.5)  | 0.41<br>(0.01) | 0.13<br>(0.00)                                                                                            | 0.47<br>(0.02) |                |
|                      | <i>ChimAtCAD D 1</i> | 0.42<br>(0.00)                                                                                     | 77.5<br>(1.0)  | 28.7<br>(0.2)  | 0.37<br>(0.00) | 0.10<br>(0.01)                                                                                            | 0.47<br>(0.01) |                |
|                      | <i>ChimAtCAD D 2</i> | 0.42<br>(0.03)                                                                                     | 65.1<br>(2.4)  | 23.6<br>(0.6)  | 0.36<br>(0.00) | 0.10<br>(0.04)                                                                                            | 0.21<br>(0.00) |                |
|                      | <i>ChimAtCAD C 1</i> | 0.18<br>(0.02)                                                                                     | 80.6<br>(7.0)  | 21.4<br>(2.0)  | 0.27<br>(0.00) | 0.64<br>(0.04)                                                                                            | 1.95<br>(0.22) |                |
|                      | <i>ChimAtCAD C 2</i> | 0.29<br>(0.01)                                                                                     | 110.3<br>(3.3) | 31.8<br>(0.9)  | 0.29<br>(0.00) | 0.30<br>(0.3)                                                                                             | 1.32<br>(0.24) |                |
|                      | <i>ChimPaCAD 1</i>   | 0.37<br>(0.03)                                                                                     | 83.7<br>(0.03) | 17.6<br>(0.4)  | 0.21<br>(0.00) | 0.20<br>(0.03)                                                                                            | 1.45<br>(0.08) |                |
|                      | <i>ChimPaCAD 2</i>   | 0.73<br>(0.03)                                                                                     | 105.2<br>(1.7) | 23.1<br>(0.5)  | 0.22<br>(0.00) | 0.32<br>(0.01)                                                                                            | 2.00<br>(0.06) |                |
|                      | Experiment 2         | <i>WT1</i>                                                                                         | 1<br>(0.01)    | 152.7<br>(3.5) | 53.1<br>(0.7)  | 0.32<br>(0.01)                                                                                            | 0.06<br>(0.01) | 0.08<br>(0.00) |
|                      |                      | <i>WT2</i>                                                                                         | 1.1<br>(0.01)  | 135.3<br>(6.6) | 49.1<br>(4.4)  | 0.36<br>(0.01)                                                                                            | 0.06<br>(0.02) | 0.08<br>(0.04) |
| <i>Atcad cd 1</i>    |                      | 0.2<br>(0.1)                                                                                       | 11.7<br>(1.8)  | 0.6<br>(0.0)   | 0.05<br>(0.01) | 4.5<br>(0.8)                                                                                              | 3.3<br>(0.7)   |                |
| <i>Atcad cd 2</i>    |                      | 0.1<br>(0.1)                                                                                       | 11.2<br>(0.3)  | 0.7<br>(0.10)  | 0.06<br>(0.00) | 3.7<br>(0.01)                                                                                             | 2.6<br>(0.6)   |                |
| <i>ChimPttSAD1 1</i> |                      | 0.22<br>(0.01)                                                                                     | 29.9<br>(0.63) | 9.6<br>(0.03)  | 0.32<br>(0.01) | 2.32<br>(0.10)                                                                                            | 2.45<br>(0.12) |                |
| <i>ChimPttSAD1 2</i> |                      | 0.17<br>(0.00)                                                                                     | 27.7<br>(0.8)  | 9.4<br>(0.4)   | 0.34<br>(0.00) | 2.82<br>(0.06)                                                                                            | 3.02<br>(0.03) |                |

<sup>a</sup> Yield in main lignin-derived thioacidolysis monomers (expressed in  $\mu$ moles per gram of Klason lignin) recovered from conventional H, G or S  $\beta$ -O-4 linked lignin units or from coniferaldehyde or sinapaldehyde linked at C $\beta$  by  $\beta$ -O-4 bonds. SD from 2 repetitions are in bracket.
