# Supplementary material
Source: PubMed Central journal article supplement (PMC1167552)
Supplement: plntcell_tpc.105.030767_4.pdf [file plntcell_tpc.105.030767_4.pdf]

**Table 4.** Primers used for real-time PCR analysis

| Names                   | Sequences of primers               |
|-------------------------|------------------------------------|
| AtCAD1-5'               | CCTCCATGAATGATCCGGATCTAAGAA        |
| AtCAD1-3'               | CGAAATAAGGTAACCTTGTCTGAGAAGAAA     |
| AtCADA-5'               | GGCAGAGCATGGCATAAAAGCAGAAA         |
| AtCADA-3'               | GCCAATGTATTAGAAATGTCAATGACAAA      |
| AtCADB1-5'              | CGATGAAGCCAACCTCTTAACCTAGAAA       |
| AtCADB1-3'              | CAACTGATAAAGTACATGCAGTGTGGTAATA    |
| AtCADB2-5'              | CATTGAAGCCTAATCCTAATTTATAAGTTTTAA  |
| AtCADB2-3'              | ACTATTCATTTATTGGATTAAGCATACCAAATTA |
| AtCADEF-5' <sup>a</sup> | ATCGTTTCGGATATTGAGCTCATAAA         |
| AtCADEF-3' <sup>a</sup> | TCTCAGCTGACGACTCAGGGAGTAAA         |
| AtCADG-5'               | GGTATGAGAATGCTCGCTGGAAGTGTA        |
| AtCADG-3'               | GGATAAATCTTATGAGCTGCACAGAAA        |
| 4Cl1-5'                 | TTTTTCATCGTTGATCGATTGAAAGAA        |
| 4Cl1-3'                 | CAATTAGCGACTGCAAAACGAACAA          |
| C4H-5'                  | CGTTATGAAACCAAGGAAGTGTAAA          |
| C4H-3'                  | GCAATCGTAGAACGAACCATTTAAA          |
| CST-5'                  | GTATGATTTTCAGCTTCCATGCAATAA        |
| CST-3'                  | GAAAGCAGCTCTAATTCTCCCAAAA          |
| OMT1-5'                 | CCTTATTGAGTTACTCAAGAAGCTCTAAAA     |
| OMT1-3'                 | GGAACCGTGGAAGGAGATATGAGATAA        |
| CCoAOMT1-5'             | AAGCGTTTGATCGATCTTGTGAAAA          |
| CCoAOMT1-3'             | AAGAGCCTTGTTAAGCTCAAGAACAAA        |
| CCR1-5'                 | AGATCGGGTCTTGAAAAGCTTATTAA         |
| CCR1-3'                 | ACAGAGGTTTCACATAACCAGAGACAA        |

<sup>a</sup> Primers are designed to amplify both *AtCAD E* and *AtCAD F* genes.
