# Supplementary material
Source: PubMed Central journal article supplement (PMC1167552)

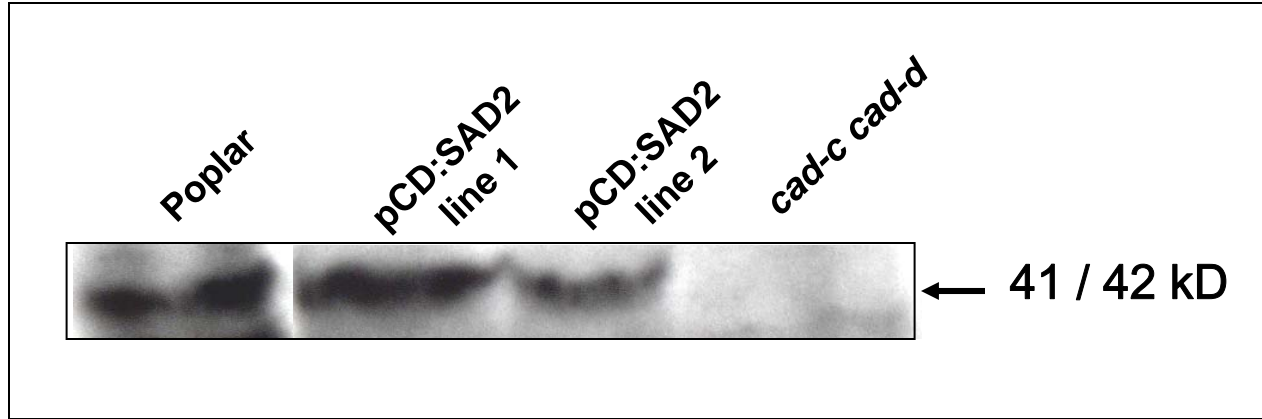

Supplement: plntcell_tpc.105.030767_2.pdf [file plntcell_tpc.105.030767_2.pdf]
